# Supplementary material for: Interfacial properties modulated by the water confinement in reverse micelles created by the ionic liquid-like surfactant bmim-AOT
Source: Royal Society of Chemistry journal article supplement (doi:10.1039/c8sm02217h), 2018-12-27
Supplement: c8sm02217h1.pdf [file c8sm02217h1.pdf]

## ELECTRONIC SUPPLEMENTARY INFORMATION

### **Interfacial properties modulated by the water confinement in Reverse Micelles created by the Ionic liquid-like surfactant bmim-AOT**

Cristian M. O. Lépori<sup>[a]</sup>, N. Mariano Correa<sup>[a]</sup>, Juana J. Silber<sup>[a]</sup>, Fabián Vaca Chávez<sup>[b,c]\*</sup> and R.

Darío Falcone<sup>[a]\*</sup>

<sup>[a]</sup> Dr. C. M. O. Lépori, Prof. J.J. Silber, Dr. N. M. Correa and Dr. R. D. Falcone. Departamento de Química. Universidad Nacional de Río Cuarto. Agencia Postal # 3. C.P. X5804BYA Río Cuarto. ARGENTINA.

<sup>[b]</sup> Dr. F. Vaca Chávez. Facultad de Matemática, Astronomía, Física y Computación (FaMAF), Universidad Nacional de Córdoba (UNC). Medina Allende s/n, Ciudad Universitaria, X5016LAE Córdoba, Argentina.

<sup>[c]</sup> Instituto de Física Enrique Gaviola (IFEG), CONICET, Medina Allende s/n, Ciudad Universitaria, X5016LAE, Córdoba, Argentina.

\* Corresponding-Authors: Dr. R. Darío Falcone. E-mail: [rfalcone@exa.unrc.edu.ar](mailto:rfalcone@exa.unrc.edu.ar)

Dr. F. Vaca Chávez. E-mail: [fvacachavez@famaf.unc.edu.ar](mailto:fvacachavez@famaf.unc.edu.ar)

## EXPERIMENTAL SECTION

### Methods

*RM<sub>s</sub> preparation:* The stock solutions of bmim-AOT in the organic solvent (benzene and chlorobenzene) were prepared by mass and volumetric dilution. To obtain optically clear solutions, they were shaken in a sonicating bath. The amount of water present in the system is expressed as the molar ratio between water and surfactant ( $W_0 = [\text{H}_2\text{O}]/[\text{surfactant}]$ ). The  $W_0$  was varied between 0-6 for bmim-AOT RM<sub>s</sub>. It was not possible to obtain higher values of  $W_0$  due to turbidity problems. The lowest value for  $W_0$  ( $W_0 = 0$ ), corresponds to a system without water addition. The appropriate amounts of H<sub>2</sub>O (D<sub>2</sub>O for <sup>2</sup>H NMR experiments) were incorporated into RM<sub>s</sub> solutions by means of microsyringes.

Similar procedures were performed by the Na-AOT RM<sub>s</sub> experiments.

For the absorption experiments, a  $1 \times 10^{-2}$  M solution of QB in methanol (Sintorgan HPLC quality) was prepared. The appropriate amount of this solution to obtain a concentration of  $2 \times 10^{-4}$  M for QB in the RM<sub>s</sub> was transferred into a volumetric flask, and the methanol was evaporated by bubbling dry N<sub>2</sub>; then, the surfactant RM<sub>s</sub> stock solution was added to the residue and agitated in a sonicating bath until the RM<sub>s</sub> was optically clear. For the experiments varying the surfactant concentration at  $W_0$  constant, a stock solution of surfactant 0.2 M was used. Thus, to the cell baring 2 mL of QB of the same concentration in the nonpolar solvent, was added the appropriate amount of surfactant and molecular probe stock solution to obtain a given concentration of surfactant in the micellar media. Therefore, the absorbance values of the molecular probe were not affected by dilution. For the experiments varying the water content, an RM<sub>s</sub> solution prepared at  $[\text{surfactant}] = 0.06$  M was employed. Similar procedure was employed for the experiments using  $[\text{Cu}(\text{acac})(\text{tmen})][\text{B}(\text{C}_6\text{H}_5)_4]$ .

### General

The absorption spectra were measured by using Shimadzu 2401 equipment at 25 (0.1 °C unless otherwise indicated). The path length used in the absorption experiments was 1 cm.  $\lambda_{\text{max}}$  was measured by taking the midpoint between the two positions of the spectrum where the absorbance is equal to  $0.9 \times \text{Abs}_{\text{max}}$ .

The  $^2\text{H}$  NMR spin-lattice relaxation times,  $T_1$ , were obtained on a Bruker Avance II 300 spectrometer operating at a deuterium Larmor frequency of 46.05 MHz. The measurements were performed using the inversion-recovery pulse sequence,  $(\pi)_x - \tau - (\pi)_{x,-x} - \text{Acq}$ , as reported previously<sup>1</sup>, where  $\tau$  indicates the magnetization recovery period. The dependence of the normalized measured signal intensity with  $\tau$  is  $I(\tau) = 1 - 2\exp(-\tau/T_1)$ .<sup>2,3</sup> All NMR data were processed using MestReC 4.8.6 for window and plotted and fitted using Microcal OriginPro 7.

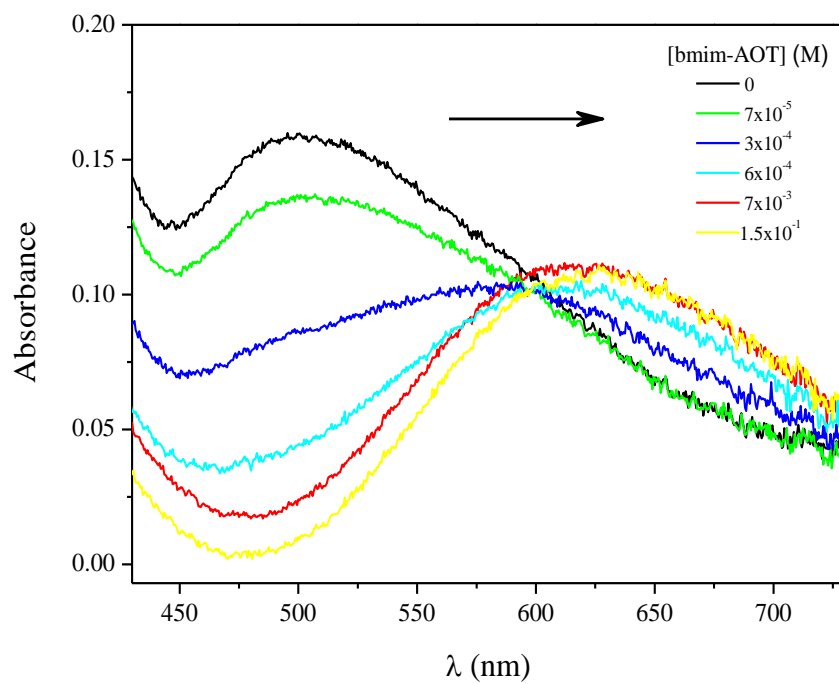

**Figure S1.** Absorption spectra of  $[\text{Cu}(\text{acac})(\text{tmen})][\text{B}(\text{C}_6\text{H}_5)_4]$  complex in chlorobenzene/bmim-AOT RMs varying [bmim-AOT] at  $W_0 = 0$ .  $[[\text{Cu}(\text{acac})(\text{tmen})][\text{B}(\text{C}_6\text{H}_5)_4]] = 1 \times 10^{-3}$  M.

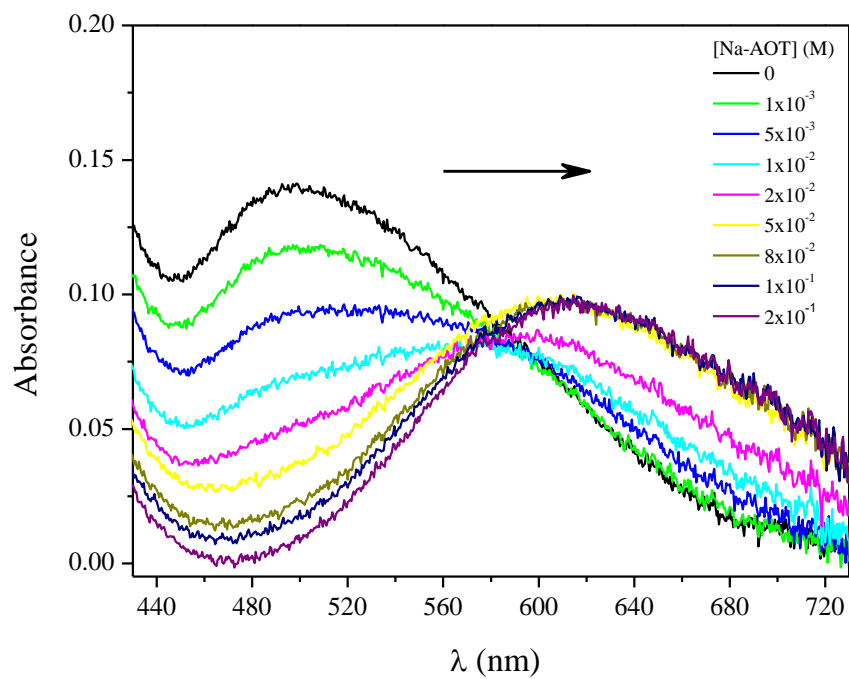

**Figure S2.** Absorption spectra of  $[\text{Cu}(\text{acac})(\text{tmen})][\text{B}(\text{C}_6\text{H}_5)_4]$  complex in chlorobenzene/Na-AOT RMs varying  $[\text{Na-AOT}]$  at  $W_0 = 0$ .  $[[\text{Cu}(\text{acac})(\text{tmen})][\text{B}(\text{C}_6\text{H}_5)_4]] = 1 \times 10^{-3} \text{ M}$ .

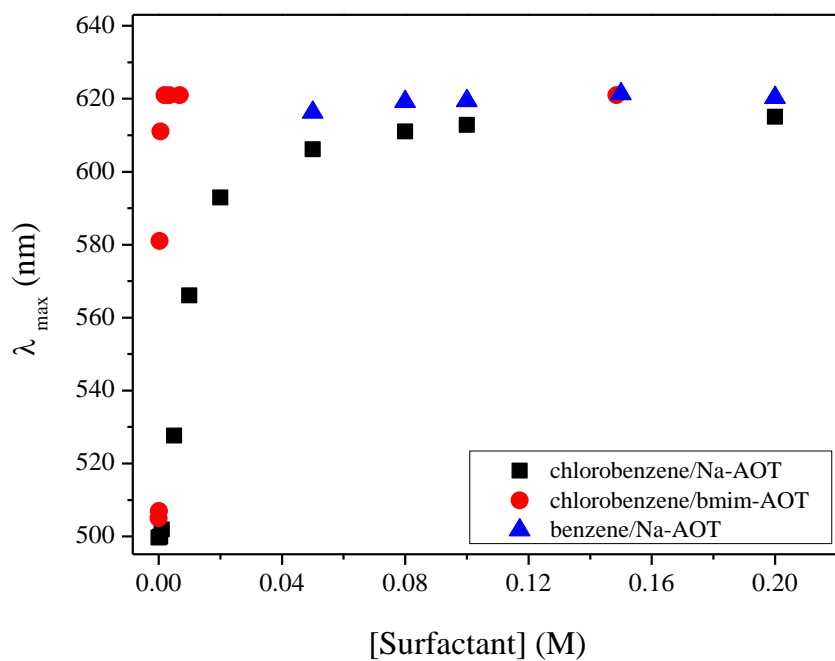

**Figure S3.** Absorption maxima shifts ( $\lambda_{\max}$ ) values of  $[\text{Cu}(\text{acac})(\text{tmen})][\text{B}(\text{C}_6\text{H}_5)_4]$  in different RMs as a function of [surfactant] at  $W_0 = 0$ .  $[[\text{Cu}(\text{acac})(\text{tmen})][\text{B}(\text{C}_6\text{H}_5)_4]] = 1 \times 10^{-3} \text{ M}$ .

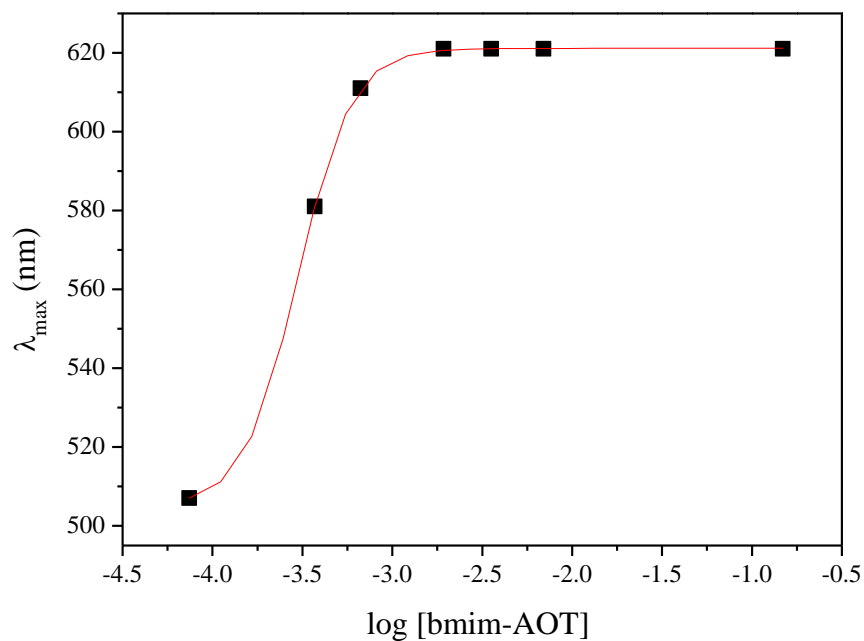

**Figure S4.** Variation of the  $\lambda_{\max}$  of  $\text{Cu}(\text{acac})(\text{tmen})\text{B}(\text{C}_6\text{H}_5)_4$  as a function of  $\log[\text{bmim-AOT}]$  in chlorobenzene/bmim-AOT RMs at  $W_0 = 0$ .  $[\text{Cu}(\text{acac})(\text{tmen})\text{B}(\text{C}_6\text{H}_5)_4] = 1 \times 10^{-3}$  M. The solid lines represent the sigmoidal fit using Sigmoidal–Boltzmann equation.

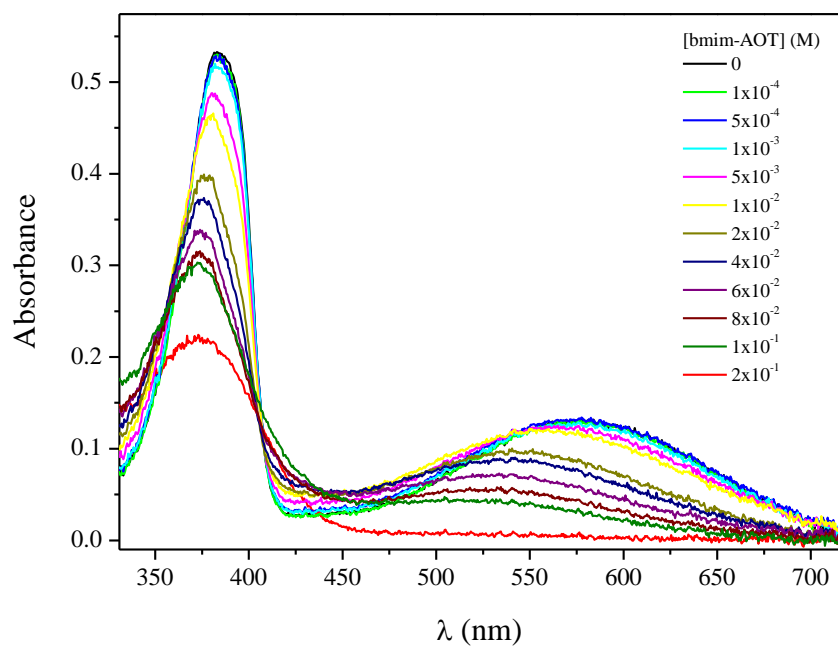

**Figure S5.** Absorption spectra of QB in benzene/bmim-AOT RMs varying [bmim-AOT] at  $W_0 = 0$ .

$[QB] = 2 \times 10^{-4}$  M.



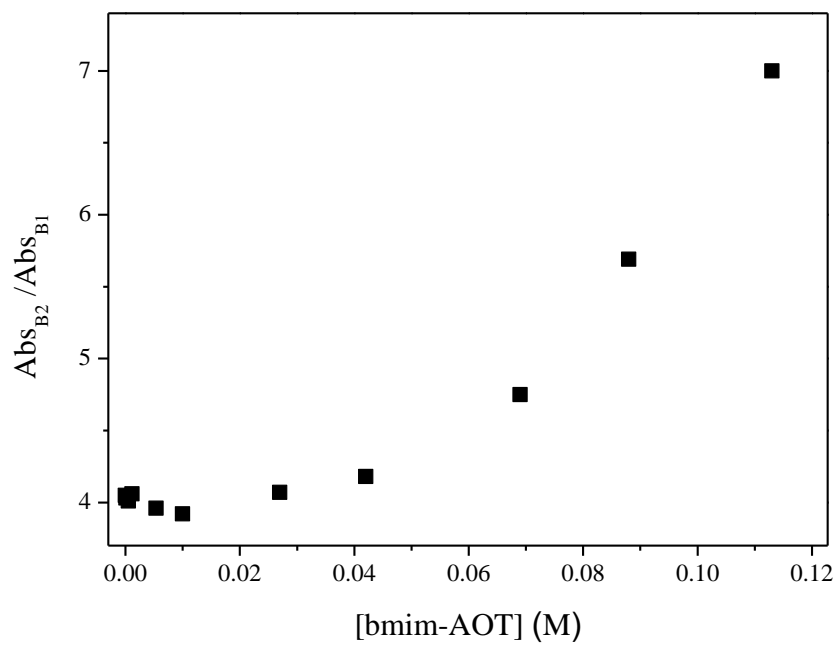

**Figure S6.** Variation of  $\text{Abs}_{\text{B2}}/\text{Abs}_{\text{B1}}$  ratio values in benzene/bmim-AOT as a function of [bmim-AOT] at  $W_0 = 0$ .

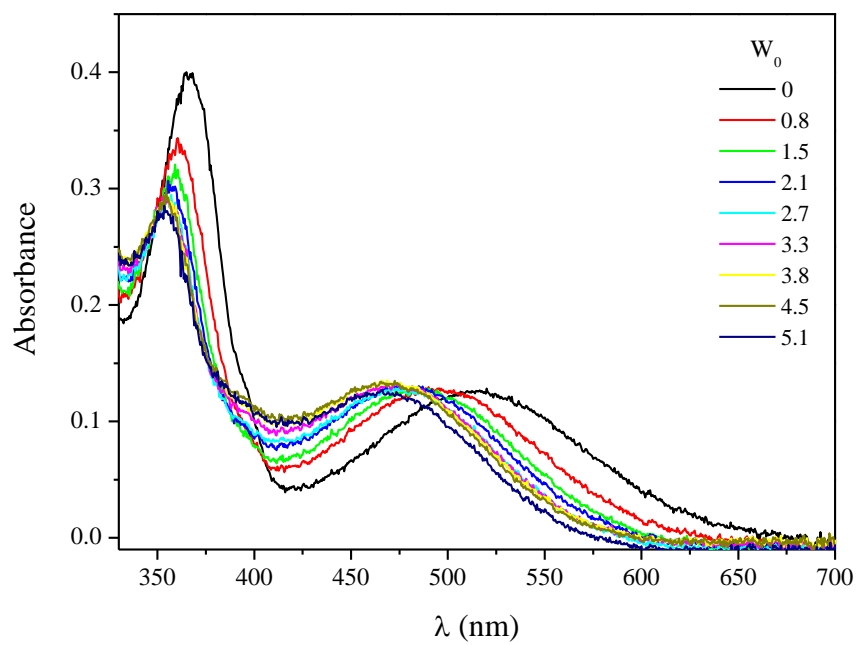

**Figure S7.** Absorption spectra of QB in benzene/Na-AOT/water RMs varying  $W_0$ . [Na-AOT] = 0.06 M, [QB] =  $2 \times 10^{-4}$  M. T = 25 °C.

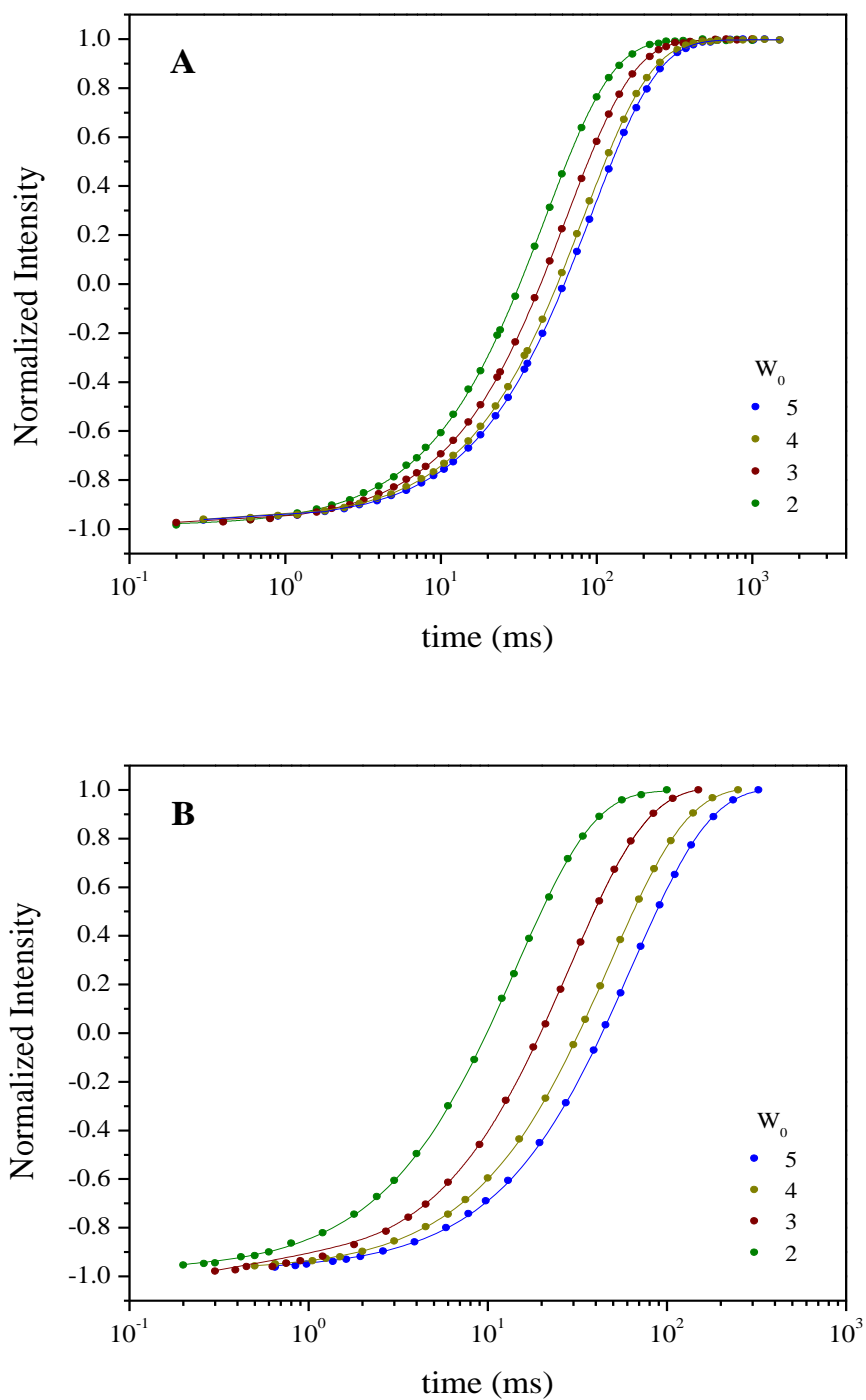

**Figure S8.** Monoexponential fit of the longitudinal relaxation decay for benzene/surfactant/D<sub>2</sub>O RMs as a function of D<sub>2</sub>O content. A) bmim-AOT and B) Na-AOT. [Surfactant] = 0.2 M.

## References

- 1 F. Vaca Chávez, P. J. Sebastião, Y. Miyake, H. Monobe and Y. Shimizu, *J. Phys. Chem. B*, 2012, **116**, 2339–2346.
- 2 J. Kowalewski and L. Maler, *Nuclear spin relaxation in liquids: theory, experiments, and applications*, Taylor & Francis, 2006, vol. 2.
- 3 J. Keeler, *Understanding NMR spectroscopy*, John Wiley and Sons, 2010.
